# Supplementary material for: Electrochemical Monitoring of Sulfadiazine via La@CeO Incorporated with Reduced Graphene Oxide
Source: MDPI journal article supplement (doi:10.3390/analytica4030023), 2023-07-06
Supplement: s1 [file s1]

## **Electrochemical Monitoring of sulfadiazine via La@CeO incorporated with Reduced Graphene Oxide**

Francis Packiaraj Don Disouza<sup>a</sup>, Ruspika Sundaresan<sup>a</sup>, Shen-Ming Chen<sup>a,\*</sup>, and Balaji Ramachandran<sup>b,\*</sup> and Narendhar Chandrasekar<sup>c</sup>

<sup>a</sup>Department of Chemical Engineering and Biotechnology, National Taipei University of Technology, No.1, Section 3, Chung-Hsiao East Road, Taipei 106, Taiwan.

<sup>b</sup>Department of Electronics and Communication Engineering, Koneru Lakshmaiah Education Foundation, Andhra Pradesh, 522302, India.

<sup>c</sup>Department of BioNano Technology, Gachon University, 1342 Seongnam-Daero, Sujeong-Gu, Seongnam-si 13120, Gyeonggi-do, Republic of Korea

\*Corresponding author:

Prof. Dr. S. M. Chen, Email: smchen1957@gmail.com, smchen78@ms15.hinet.net, Tel: +886 2270 17147, Fax: +886 2270 25

Dr. Ramachandran Balaji, email: [rbalaji@kluniversity.in](mailto:rbalaji@kluniversity.in).

Number of pages:3

Number of figures:1

Number of table :1

## **S1. Chemicals and reagents**

Sulfadiazine (SZ) ( $\geq 99.0 - 101.0$  %), Ammonium cerium (IV) nitrate  $(\text{NH}_4)_2[\text{Ce}(\text{NO}_3)_6]$  ( $\geq 98$  %), Lanthanum chloride hexahydrate  $\text{LaCl}_3 \cdot 6\text{H}_2\text{O}$  ( $\geq 98$  %) and Polyethylene glycol (PG) ( $\geq 99.0$  %) all the chemicals are received from Sigma-Aldrich. The above chemicals are in analytical grade so used without purification. Mixing of  $\text{Na}_2\text{HPO}_4$  ( $\geq 99.0$  %) and  $\text{NaH}_2\text{PO}_4$  ( $\geq 99.0$  %) dissolved in deionized water (DI) to prepare 0.1 M of phosphate buffer solution (PBS) the pH was adjusted using  $\text{NaOH}$  ( $\geq 85$  %) or  $\text{HCl}$  ( $\geq 37$  %) were procured from Sigma Aldrich used without purification. Double distilled water is collected and used for all the electrochemical characterization.

## **S2. Material characterization**

The structural conformation of the synthesized nanocomposite was studied by Field Emission scanning electron microscopy (FESEM, Hitachi s-3000H). The chemical formation and the quantity of the element were studied by Energy-dispersive X-ray spectrometer bond Field emission scanning electron microscopy. The chemical composition and the individual elemental percentage were investigated through an energy-dispersive X-ray (EDX, HORIBA EMAX X-ACT, Sensor +24 V = 16 W, resolution at 5.9 k eV) attached to the HRTEM. The crystallinity nature of the synthesized material was analyzed by X-ray diffraction (XRD, X'Pert-PRO, PAN analytical B.V., The Netherlands) and a diffractometer with Cu K $\alpha$  radiation ( $\lambda = 1.54 \text{ \AA}$ ). Then the materials' vibrational bands are examined by a Micro-Raman spectrometer. Electrochemical studies of the prepared material were performed under Electrochemical impedance spectroscopy (EIS), and the material's electrochemical measurements were analyzed in electrochemical apparatus such as cyclic voltammetry (CV CHI 1205B) and differential pulse voltammetry (DPV, CHI 900, CH instruments). These all experiments were carried out in a conventional three-electrode setup.

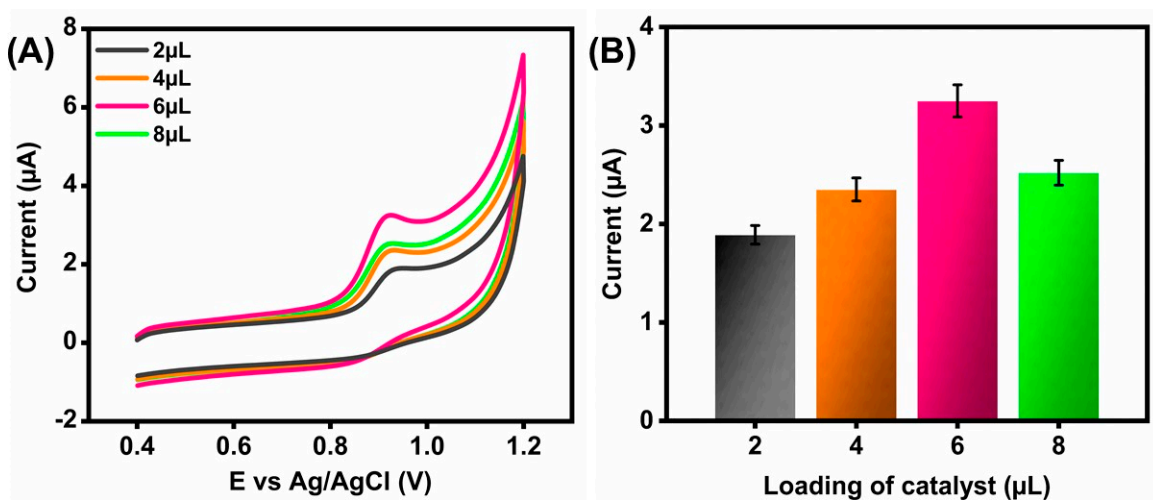

**Fig. S1.** (A) depicts the CV redox current response of different loading concentrations of LCO@RGO/GCE in 0.1 M PBS of pH 7 with 100  $\mu\text{M}$  of SZ. (B) the corresponding bar diagram for anodic current response vs different loading concentrations of LCO@RGO/GCE

**Table. S1.** Determination of SZ in human blood serum and river water in front of fabricated LCO@RGO/GCE

| Sample      | Added ( $\mu\text{M}$ ) | Found ( $\mu\text{M}$ ) | Recovery (%) |
|-------------|-------------------------|-------------------------|--------------|
| Blood serum | 10                      | 9.89                    | 98.9         |
|             | 20                      | 19.86                   | 99.3         |
|             | 30                      | 28.95                   | 96.5         |
| River water | 10                      | 9.96                    | 99.6         |
|             | 20                      | 19.92                   | 99.6         |
|             | 30                      | 28.97                   | 96.5         |
