# Supplementary material for: Electrochemical Monitoring of Sulfadiazine via La@CeO Incorporated with Reduced Graphene Oxide
Source: MDPI journal article supplement (doi:10.3390/analytica4030023), 2023-07-06
Supplement: s1 [file s1]

Archive with 1 entries (1 files):
- analytica-2398638-supplementary.pdf
